# Supplementary material for: Solid-State NMR and Raman Spectroscopic Investigation of Fluoride-Substituted Apatites Obtained in Various Thermal Conditions
Source: MDPI journal article supplement (doi:10.3390/ma14226936), 2021-11-16
Supplement: s1 [file s1]

## Supplementary materials

article title: **Solid-state NMR and Raman spectroscopic investigation of fluoride-substituted apatites obtained in various thermal conditions**

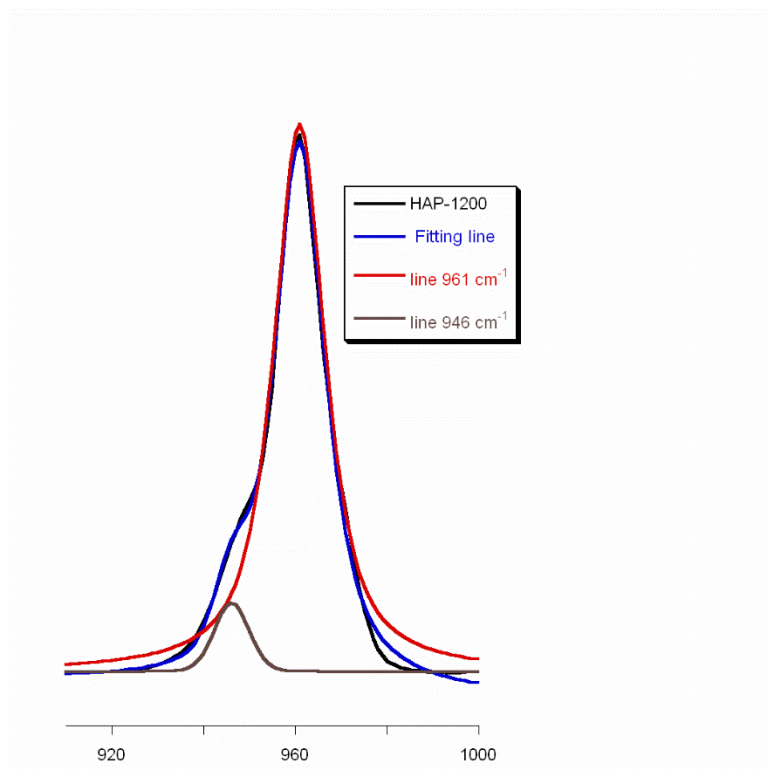

**Figure S1.** Raman spectra of curve fitting HAP-1200 range 900 cm<sup>-1</sup> and 1000 cm<sup>-1</sup>.

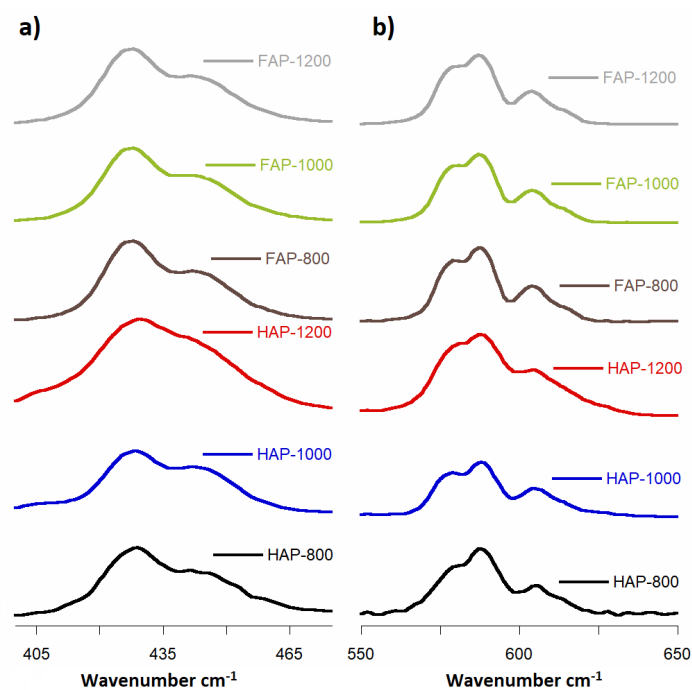

**Figure S2.** Raman spectra a) range 400 cm<sup>-1</sup> and 475 cm<sup>-1</sup> b) ) range 550 cm<sup>-1</sup> and 650 cm<sup>-1</sup>

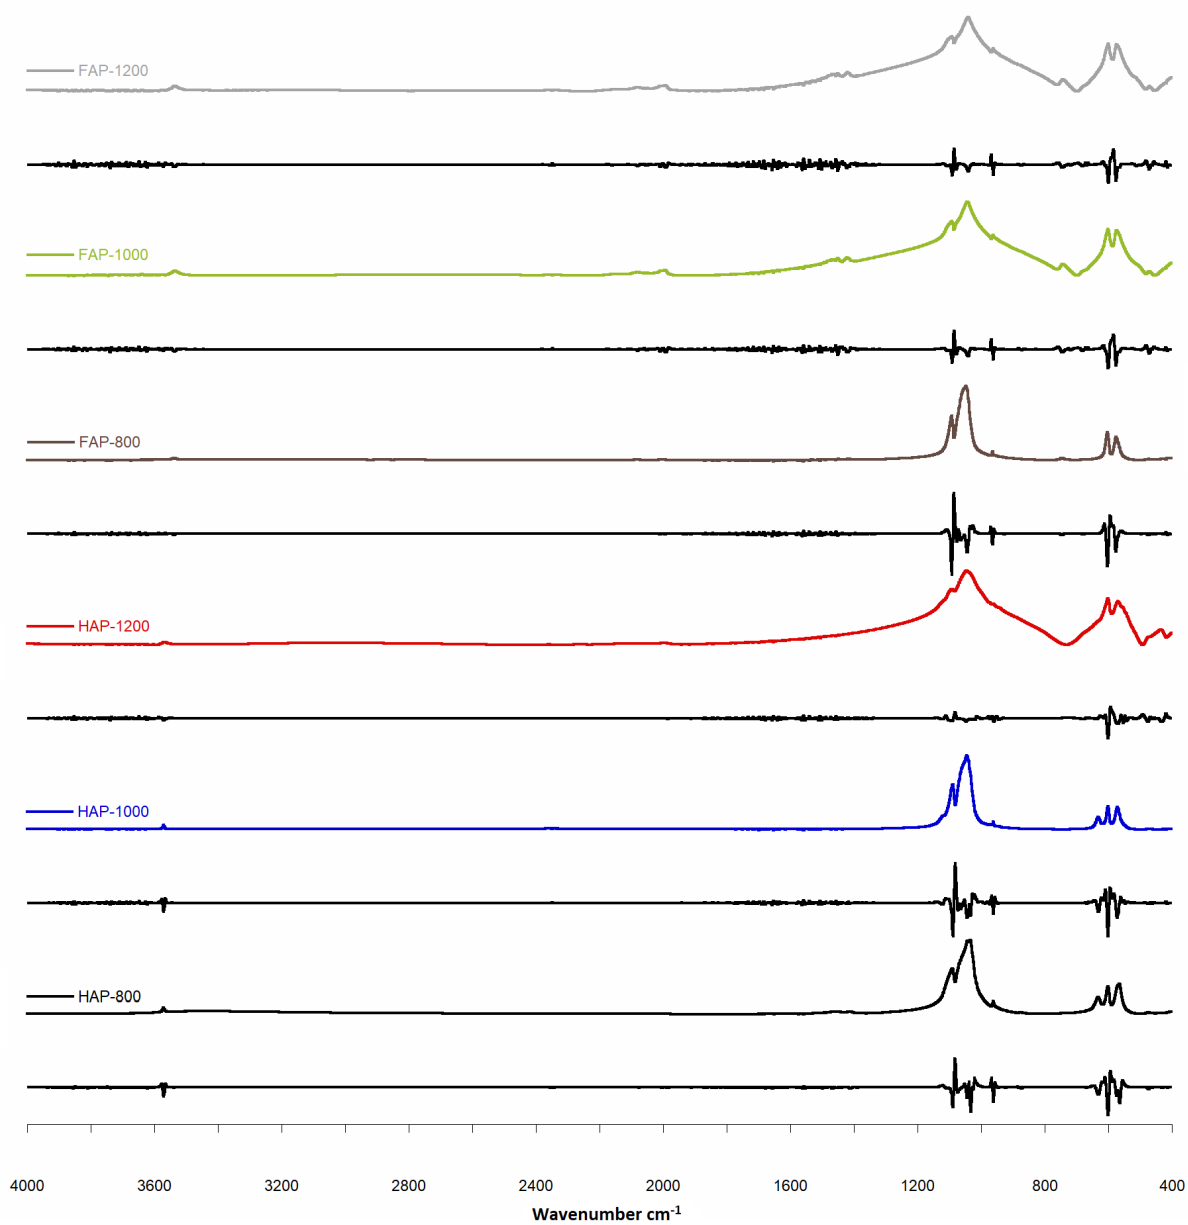

**Figure S3.** FT-IR spectra with the corresponding second derivative.

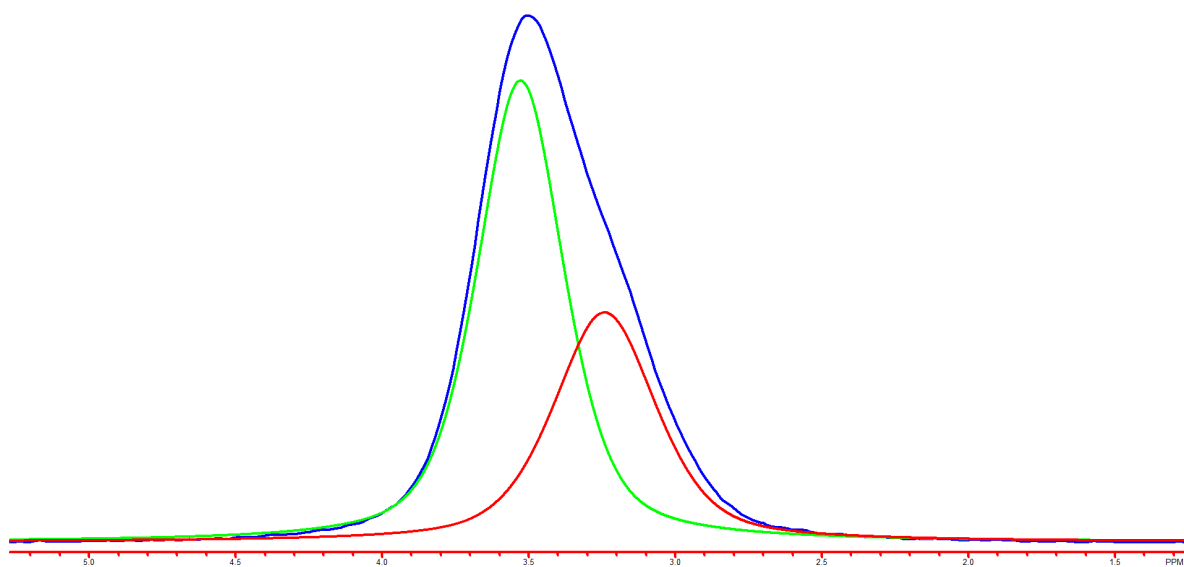

**Figure S4.**  $^{19}\text{F}$  MAS NMR spectra of curve fitting FAP-800 sample.

**Table S1.** Raman vibration modes of phosphate and hydroxyl in the apatitic samples.

| Vibration mode     | Vibration frequency (cm <sup>-1</sup> ) |              |      |
|--------------------|-----------------------------------------|--------------|------|
|                    | <i>Penel et al., 1997 *</i>             | Present work |      |
|                    |                                         | HAP          | FAP  |
| PO <sub>4</sub> v1 | 965                                     | 961          | 964  |
| PO <sub>4</sub> v2 | 432                                     | 430          | 430  |
|                    | 449                                     | 450          | 450  |
| PO <sub>4</sub> v3 | -                                       | 1028         | -    |
|                    | 1034                                    | 1034         | 1033 |
|                    | 1042                                    | 1047         | 1043 |
|                    | 1053                                    | 1057         | 1053 |
|                    | 1061                                    | 1063         | 1063 |
|                    | 1081                                    | 1075         | 1078 |
| PO <sub>4</sub> v4 | 581                                     | 578          | 578  |
|                    | 592                                     | 587          | 587  |
|                    | 608                                     | 606          | 606  |
|                    | 617                                     | 616          | 616  |
| PO <sub>4</sub> v1 | 3573-HAP                                | 3573         | -    |
|                    | 3537-FAP                                | -            | 3537 |

\* Penel, G.; Leroy, G.; Rey, C.; Sombret, B.; Huvenne, J.P.; Bres, E. *Infrared and Raman microspectrometry study of fluor- fluor-hydroxy and hydroxy-apatite powders. Journal of Materials Science: Materials in Medicine* **1997**, 8, 271-276, doi:10.1023/A:1018504126866.
